# Supplementary material for: Facile fabrication of silver nanoparticle-coated silica-C18 core–shell microspheres and their applications in SERS detection
Source: Royal Society of Chemistry journal article supplement (doi:10.1039/c7ra02098h), 2017-01-01
Supplement: c7ra02098h1.pdf [file c7ra02098h1.pdf]

## *Supplementary Information*

Facile fabrication of silver nanoparticle-coated silica-C18 core-shell microspheres and their applications in SERS detection

Lin Xue,<sup>a, b, ‡</sup> Hai-Xin Gu,<sup>b, ‡, \*</sup> Shou-Qi Yuan<sup>a, \*</sup> and Da-Wei Li<sup>c, \*</sup>

*a* Research Center of Fluid Machinery Engineering and Technology, Jiangsu University, Zhenjiang, Jiangsu 212013, P. R. China

*b* Shanghai Fire Research Institute of Ministry of Public Security, Shanghai 200438, P. R. China

*c* Key Laboratory for Advanced Materials, Shanghai Key Laboratory of Functional Materials Chemistry, & School of Chemistry and Molecular Engineering, East China University of Science and Technology, Shanghai 200237, P. R. China.

*‡* These authors contributed equally to this work and should be considered as co-first authors.

\* Corresponding Authors: [guhaixin@126.com](mailto:guhaixin@126.com), [shouqiy@ujs.edu.cn](mailto:shouqiy@ujs.edu.cn), [daweili@ecust.edu.cn](mailto:daweili@ecust.edu.cn).

### **General Methods**

#### **1 Materials and Apparatus**

All the chemicals were commercially available and used without further treatment. Silver nitrate (99%), sodium citrate (99%), (3-aminopropyl) trimethoxysilane (APTMS, 97%), rhodamine 6G (R6G, 99%), naphthalene (99%), 2,6-dimethylnaphthalene (99%), and 1-naphthol (99%) were purchased from Aladdin-Reagent (Shanghai) Co., Ltd. Deionized water with 18 MΩ cm was used in all

experimental procedures. n-Octadecane chain (C18) functionalized silica microspheres (Welchrom C18 SPE), polypropylene hollow column, and polyethylene sieve plate with pore diameter of 20  $\mu\text{m}$  were obtained from Shanghai Tokun Biotech Co., Ltd. The morphologies and compositions of the microspheres were characterized by a scanning electron microscopy instrument equipped with an energy dispersive X-ray spectrometer (JEOL, JSM-6390LA/EX-54175LMU). Raman spectral measurements were performed on a portable Raman spectrometer (B&W Tek., BWS465-785S) with 785 nm laser excitation.

## **2 Fabrication of the silver nanoparticle-coated silica-C18 core-shell microspheres**

C18-functionalized silica microspheres were immersed and dispersed in 10% (V/V) APTMS methanol solution for 12 hours. The APTMS treated microspheres were collected on a sieve plate assembled on the bottom of a hollow column, and then rinsed separately with ethanol and water. After that, the microspheres were dried and kept in storage under vacuum. The Ag NPs coated composite microspheres were prepared on the basis of a reported method.<sup>1</sup> Briefly, 300mL of water dissolving 54mg of  $\text{AgNO}_3$  was heated to boiling. Then, 6 mL trisodium citrate solution of 1.00 wt% and 15 mg as-prepared microspheres were added slowly, and the boiling was left for 15 min. The cooled solution was concentrated to 30 mL by centrifugation, and placed for a certain time. After that, the produced microspheres were transferred from the solution onto the sieve as previously reported and washed several times with deionized water.

## **3 Preparation of the small detection device and its SERS detection**

The detection device was comprised by a standing column base, and a sieve filled with the SERS-active microspheres was mounted on its bottom. The composite microspheres were dropwise added with 1 mL naphthalenes (naphthalene, 2,6-dimethylnaphthalene and 1- naphthol) sample solutions of different concentrations and subjected to Raman measurements.

In addition, the controlled experiments were performed with the following SERS substrates: i) the concentrated silver nanoparticles in colloidal solution, ii) the silver

nanoparticle layer deposited on a bare silica support.

**Table S1** Comparison of the SERS performance with the reported SERS sensors

| Limitations of detection |                        |                        | Complexity of preparation | Interference background | Development into a detection device | Direct usability for bulk solution | Ref.     |
|--------------------------|------------------------|------------------------|---------------------------|-------------------------|-------------------------------------|------------------------------------|----------|
| Nap                      | Dinap                  | Napol                  |                           |                         |                                     |                                    |          |
| $2.6 \times 10^{-7}$ M   | $2.5 \times 10^{-8}$ M | $5.4 \times 10^{-8}$ M | Easy                      | No                      | Yes                                 | good                               | Our work |
| $1.3 \times 10^{-8}$ M   | None                   | None                   | Complicated               | Yes                     | No                                  | good                               | Ref. S2  |
| $10^{-5}$ M              | None                   | None                   | Complicated               | Yes                     | No                                  | poor                               | Ref. S3  |
| $3.9 \times 10^{-6}$ M   | None                   | None                   | Easy                      | Yes                     | No                                  | good                               | Ref. S4  |
| $2.3 \times 10^{-6}$ M   | None                   | None                   | Easy                      | Yes                     | No                                  | good                               | Ref. S5  |
| $1.5 \times 10^{-6}$ M   | None                   | None                   | Easy                      | Yes                     | No                                  | good                               | Ref. S6  |
| None                     | None                   | $2 \times 10^{-5}$ M   | Complicated               | Yes                     | No                                  | poor                               | Ref. S7  |
| $1 \times 10^{-6}$ M     | None                   | None                   | Easy                      | Yes                     | No                                  | good                               | Ref. S8  |
| $2 \times 10^{-7}$ M     | None                   | None                   | Complicated               | Yes                     | No                                  | good                               | Ref. S9  |

## References

- S1 P.C. Lee and D. Meisel, *J. Phys. Chem.*, 1982, **86**, 3391.
- S2 Y. H. Kwon, K. Sowoidnich, H. Schmidt, H. D. Kronfeldt, *J. Raman Spectrosc.*, 2012, **43**, 1003.
- S3 J. Du and C. Jing, *J. Phys. Chem. C*, 2011, **115**, 17829.
- S4 X. Jiang, Y. Lai, M. Yang, H. Yang, W. Jiang and J. Zhan, *Analyst*, 2012, **137**, 3995.
- S5 K. Carron, L. Peltersen and M. Lewis, *Environ. Sci. Technol.*, 1992, **26**, 1950.
- S6 H. Schmidt, N. B. Ha, J. Pfannkuche, H. Amann, H.-D. Kronfeldt and G. Kowalewska, *Mar. Pollut. Bull.*, 2004, **49**, 229.
- S7 X. Dong, X. Zou, X. Liu, P. Lu, J. Yang, D. Lin, L. Zhang and L. Zha, *Colloid Surface A: Physicochem. Eng. Aspects*, 2014, **452**, 46.
- S8 O. Péron, E. Rinnert, T. Toury, M. Lamy de la Chapelle and C. Compère, *Analyst*, 2011, **136**, 1018.
- S9 K. Kim, H. J. Jang and K. S. Shin, *Analyst*, 2009, **134**, 308.
